# Supplementary material
Source: publisher figshare collection journal article supplement (https://gsapubs.figshare.com/articles/dataset/_/23571699)
Supplement: Supplementary file 1 [file 1]

## Sheet: S1 - Corrected MIs
Melt Inclusion compositions after correction for post entrapment crystallization and re-equilibration
Sample	n	SiO2	TiO2	Al2O3	Fe2O3	FeO	FEO*	MnO	MgO	CaO	Na2O	K2O	P2O5	S (ppm)	PEC Olivine addition (wt. %)
10R4W MI-01	1	49.998	0.765	15.134	1.44	8.553	9.848	0.151	9.414	12.923	1.468	0.067	0.088	1032.13	16.89
10R4W MI-02	1	50.233	0.692	14.912	1.451	8.573	9.879	0.139	9.68	12.593	1.597	0.071	0.06	902.01	18.08
10R4W MI-04	1	50.152	0.738	15.366	1.426	8.575	9.858	0.141	9.538	12.27	1.668	0.079	0.047	977.76	14.34
10R4W MI-06a	1	50.201	0.71	15.119	1.451	8.54	9.845	0.129	9.319	12.716	1.657	0.094	0.064	844.76	15.73
10R4W MI-06b	1	50.151	0.728	15.073	1.448	8.546	9.849	0.115	9.399	12.853	1.549	0.087	0.051	929.07	18.77
10R4W MI-07	1	50.019	0.702	15.053	1.466	8.519	9.838	0.136	9.264	13.124	1.624	0.059	0.034	869.61	15.84
10R4W MI-09	1	49.963	0.714	15.324	1.446	8.545	9.846	0.15	9.341	12.714	1.683	0.063	0.057	851.4	15.91
10R4W MI-10	1	50.11	0.742	15.157	1.445	8.547	9.847	0.109	9.335	12.779	1.565	0.11	0.101	867.36	19.25
10R4W MI-12	1	49.983	0.776	15.23	1.444	8.556	9.855	0.111	9.492	12.636	1.653	0.058	0.062	889.17	19.54
10R4W MI-13	2	49.889	0.71	15.277	1.455	8.524	9.833	0.139	9.206	13.059	1.62	0.067	0.054	846.81	14.45
10R4W MI-17	1	49.804	0.773	15.124	1.462	8.532	9.847	0.134	9.367	13.059	1.611	0.057	0.077	988.38	15.16
4R2W62 MI-1	1	50.139	0.725	15.295	1.441	8.563	9.859	0.129	9.466	12.35	1.762	0.07	0.061	888.28	18.44
4R2W62 MI-2	1	50.083	0.716	15.555	1.429	8.573	9.859	0.106	9.469	12.121	1.837	0.053	0.057	928.4	17.91
4R2W62 MI-3	1	49.791	0.71	15.311	1.443	8.562	9.861	0.137	9.482	12.922	1.535	0.047	0.059	927.59	17.15
4R2W62 MI-5a	1	49.945	0.748	15.228	1.449	8.542	9.846	0.148	9.386	12.777	1.65	0.069	0.058	909.5	17.31
4R2W62_MI-5b	2	50.08	0.733	15.262	1.446	8.545	9.846	0.127	9.39	12.554	1.728	0.071	0.066	919.08	17.17
4R2W62 MI-10a	1	50.028	0.678	14.911	1.469	8.539	9.86	0.124	9.464	13.065	1.573	0.081	0.068	879.8	19.77
4R2W62 MI-10c	1	49.833	0.763	15.227	1.449	8.558	9.863	0.108	9.536	12.751	1.634	0.055	0.084	875.88	22.18
4R2W62 MI-09	1	49.549	0.855	15.031	1.47	8.543	9.865	0.159	9.502	13.087	1.58	0.09	0.135	997.1	17.92
4R2W62 MI-06	1	49.719	0.699	15.042	1.474	8.534	9.861	0.133	9.451	13.256	1.596	0.042	0.055	810.24	18.04
4R2W62 MI-4	2	49.803	0.759	15.079	1.457	8.545	9.857	0.153	9.504	13.035	1.554	0.048	0.063	871.06	11.41
5R8W MI-1	3	49.841	0.785	15.263	1.449	8.533	9.837	0.147	9.271	13.03	1.571	0.062	0.048	872.03	11.26
5R8W MI-2a	2	50.032	0.767	15.118	1.449	8.548	9.852	0.131	9.45	12.709	1.625	0.091	0.08	849.66	19.4
5R8W MI-2b	1	50.013	0.72	15.438	1.435	8.568	9.859	0.136	9.555	12.185	1.816	0.063	0.07	815.36	19.37
5R8W MI-3a	2	49.883	0.718	15.087	1.458	8.54	9.852	0.144	9.441	13.059	1.547	0.071	0.053	867	17.23
5R8W MI-3b	1	50.065	0.722	15.011	1.452	8.547	9.854	0.135	9.449	12.93	1.528	0.075	0.086	897.48	19.55
5R8W MI-5	1	49.676	0.784	15.05	1.463	8.53	9.847	0.151	9.39	13.33	1.497	0.03	0.099	897.82	17.58
5R8W MI-6	3	49.816	0.724	15.033	1.464	8.539	9.857	0.15	9.473	13.115	1.55	0.074	0.062	916.98	11.21
5R8W MI-7	1	49.809	0.67	15.306	1.456	8.538	9.849	0.115	9.398	12.909	1.663	0.07	0.065	895.7	17.91
5R8W MI-10	1	50.059	0.73	15.246	1.445	8.539	9.839	0.124	9.326	12.766	1.634	0.075	0.058	823.68	19.51
5R8W MI-11a	1	49.888	0.805	15.119	1.457	8.537	9.848	0.125	9.397	12.908	1.608	0.091	0.065	905.04	18.69
5R8W MI-11b	1	49.986	0.71	15.161	1.451	8.543	9.849	0.151	9.404	12.827	1.613	0.08	0.075	894.52	19.03
5R8W MI-12a	1	49.769	0.72	15.127	1.466	8.525	9.845	0.138	9.351	13.198	1.583	0.075	0.046	898.8	16.5
5R8W MI-12b	1	49.928	0.734	15.07	1.461	8.53	9.845	0.123	9.356	13.077	1.588	0.06	0.072	860.31	14.92
5R8W MI-12c	1	49.688	0.764	15.217	1.457	8.537	9.848	0.137	9.364	13.208	1.514	0.07	0.043	889.44	14.48
5R8W MI-12e	1	49.775	0.757	15.293	1.448	8.548	9.851	0.129	9.393	13.016	1.537	0.075	0.028	846.6	19.72
5R8W MI-12f	1	49.734	0.768	15.218	1.455	8.539	9.848	0.138	9.383	13.079	1.548	0.075	0.062	847.62	19.62
5R8W MI-13c	1	49.809	0.737	15.11	1.463	8.529	9.846	0.15	9.291	13.244	1.533	0.077	0.057	919.8	14.09
5R8W MI-13d	1	49.841	0.771	15.183	1.45	8.532	9.837	0.146	9.294	13.152	1.489	0.083	0.059	936.1	17.1
5R8W MI-14	3	49.773	0.766	15.159	1.458	8.532	9.844	0.146	9.31	13.211	1.52	0.072	0.054	896.7	16.66
FeO* is the inferred orginal FeOT content at time of MI entrapment

## Sheet: S2 - EPMA Uncorrected MIs
Compositions of melt inclusions measured by EMPA - uncorrected for PEC
		Compositions														Standard Errors from EPMA as derived from counting statistics
Sample	n	SiO2	TiO2	Al2O3	FeO	MnO	MgO	CaO	Na2O	K2O	P2O5	Cl (ppm)	S (ppm)	TOTAL		Si %ERR	Ti %ERR	Al %ERR	Fe %ERR	Mn %ERR	Mg %ERR	Ca %ERR	Na %ERR	K %ERR	P %ERR	Cl %ERR	S %ERR
10R4W MI-01	1	51.1413	0.885233	17.5174	8.54574	0.175429	3.47102	14.9565	1.69891	0.076929	0.102488	941.1	1212.73	98.7864		0.26525	5.46614	0.461621	0.922494	10.3611	1.12025	0.953601	2.97605	33.4527	15.2685	6.12882	5.59787
10R4W MI-02	1	51.6677	0.811347	17.4806	8.32488	0.162859	3.48657	14.7629	1.87215	0.083079	0.070068	1038.92	1074.48	98.9334		0.263824	5.8572	0.461969	0.935408	11.0321	1.11699	0.960359	2.81494	31.1573	20.9417	5.69316	6.08843
10R4W MI-04	1	50.6015	0.82756	17.2371	8.76792	0.157622	4.39546	13.7642	1.87097	0.088633	0.052913	894.9	1116.16	97.965		0.267165	5.75775	0.466843	0.909873	11.3399	0.988492	0.995835	2.81693	29.4035	26.7178	6.36668	5.9309
10R4W MI-06a	1	51.2663	0.813767	17.3259	8.78945	0.1482	3.67342	14.5729	1.89927	0.107947	0.072622	980.84	980.4	98.8659		0.265047	5.84424	0.464799	0.908846	11.9756	1.08792	0.966652	2.79772	24.5897	20.323	5.94311	6.49709
10R4W MI-06b	1	51.6126	0.857778	17.7613	7.88275	0.135396	3.12597	15.1447	1.8245	0.103282	0.060024	982.39	1105.21	98.717		0.263841	5.60383	0.457438	0.963052	12.9519	1.18298	0.947884	2.85235	25.5397	23.9099	5.93222	5.96787
10R4W MI-07	1	50.894	0.802002	17.2083	8.5726	0.155861	3.65838	15.0034	1.85572	0.067472	0.038745	933.58	1005.24	98.4504		0.265952	5.91691	0.466324	0.920943	11.4683	1.09001	0.952013	2.83346	37.7692	35.2813	6.16521	6.38064
10R4W MI-09	1	50.9659	0.819213	17.5737	8.71374	0.17218	3.66347	14.5807	1.92976	0.071834	0.06533	911.85	987.41	98.7457		0.265945	5.81167	0.461384	0.91292	10.5216	1.08928	0.966252	2.77212	35.6494	22.2398	6.27593	6.46323
10R4W MI-10	1	51.76	0.880264	17.9861	7.91927	0.129212	2.85646	15.1636	1.85708	0.13133	0.120108	953.95	1036.02	99.0024		0.263409	5.48908	0.454167	0.960628	13.495	1.24199	0.947215	2.82505	20.6196	13.4418	6.06332	6.24436
10R4W MI-12	1	51.4847	0.919569	18.0643	7.87198	0.132201	2.9376	14.9868	1.96011	0.068685	0.072857	959.93	1069.94	98.7018		0.264272	5.30014	0.453356	0.963689	13.2214	1.22351	0.952977	2.74083	37.1014	20.2477	6.03493	6.10457
10R4W MI-13	2	50.4625	0.800094	17.2039	9.04054	0.157394	3.83075	14.7066	1.82442	0.075683	0.061367	931.525	965.12	98.3529		0.267311	5.93013	0.466989	0.895349	11.7555	1.06496	0.961765	2.86585	37.6844	23.5231	6.1782	6.57625
10R4W MI-17	1	50.7627	0.882051	17.2504	8.86356	0.152648	3.90628	14.8949	1.83832	0.064506	0.087759	1093.34	1142.48	98.9268		0.266447	5.48195	0.466239	0.904756	11.6794	1.05328	0.955434	2.85073	39.409	17.3377	5.48472	5.83307
4R2W62 MI-1	1	51.9017	0.85658	18.0856	7.67526	0.151563	3.51774	14.6038	2.08307	0.083446	0.072289	904.36	1062.28	99.2277		0.263076	5.64761	0.454766	0.977097	11.7206	1.10512	0.970985	2.64149	30.5386	20.5066	6.27912	6.14062
4R2W62 MI-2	1	52.2806	0.851064	18.4905	8.17272	0.126067	3.51344	14.4092	2.18425	0.063419	0.067732	911.03	1097.87	100.36		0.262317	5.6751	0.449946	0.945011	13.7721	1.10704	0.977659	2.5766	39.3872	21.6862	6.24656	6.00201
4R2W62 MI-3	1	51.2613	0.829235	17.8798	8.75018	0.160096	3.38681	15.0898	1.79272	0.054716	0.06871	897.13	1091.66	99.4722		0.264751	5.80743	0.458045	0.911277	11.2143	1.13099	0.953711	2.88637	45.2567	21.4186	6.32162	6.02389
4R2W62 MI-5a	1	51.7433	0.878583	17.9067	8.7201	0.173595	3.26636	15.0243	1.9398	0.081257	0.067851	1035.99	1065.81	100.012		0.263378	5.54195	0.457487	0.912766	10.4568	1.15317	0.955754	2.76142	31.3279	21.6462	5.67634	6.12485
4R2W62_MI-5b	2	51.6821	0.857475	17.8529	8.6232	0.148405	3.35219	14.6848	2.02115	0.083165	0.0767155	1374.59	1081.84	99.6276		0.263621	5.66305	0.458445	0.91889	12.0242	1.14133	0.967539	2.69749	30.6968	19.5625	4.89979	6.06261
4R2W62 MI-10a	1	52.2899	0.816999	17.9704	7.99209	0.14914	2.85301	15.7461	1.89612	0.097561	0.082468	923.36	1064.31	100.093		0.261663	5.87953	0.45564	0.956359	11.917	1.23833	0.933352	2.79121	26.4865	18.3444	6.18235	6.13013
4R2W62 MI-10c	1	51.5361	0.925377	18.4494	7.11138	0.130588	2.40704	15.4485	1.97957	0.066894	0.101804	995.95	1077.84	98.364		0.263514	5.31615	0.448307	1.01738	13.3566	1.35479	0.942646	2.71545	37.3777	15.4088	5.83726	6.07237
4R2W62 MI-09	1	50.9342	1.00313	17.6293	8.58502	0.186469	3.18745	15.3503	1.85273	0.105743	0.158273	897.46	1175.57	99.2		0.265423	4.99579	0.461216	0.920455	9.8505	1.16892	0.94506	2.83535	24.6597	10.8992	6.31826	5.71906
4R2W62 MI-06	1	51.4242	0.824586	17.7548	8.56031	0.157307	3.13932	15.647	1.88439	0.049246	0.064936	985.59	964.89	99.701		0.26413	5.83825	0.459412	0.922007	11.392	1.17827	0.935928	2.80766	49.9508	22.4761	5.88989	6.57186
4R2W62 MI-4	2	50.5243	0.838793	16.6783	9.61953	0.169135	5.11281	14.417	1.71889	0.0534515	0.0704235	942.085	966.11	99.3936		0.267131	5.75143	0.477536	0.86656	10.7026	0.911175	0.976063	2.96084	46.3529	20.9856	6.0966	6.57529
5R8W MI-1	3	50.6476	0.869302	16.8897	9.51469	0.163479	4.9824	14.4187	1.73915	0.0688843	0.0527967	883.363	970.677	99.5321		0.267292	5.53964	0.47288	0.871019	11.0484	0.925097	0.981092	2.94993	36.7938	28.3551	6.36563	6.53335
5R8W MI-2a	2	52.0648	0.917721	18.0968	8.08098	0.156994	2.8971	15.2128	1.94481	0.108844	0.0958285	1129.76	1019.54	99.7916		0.262788	5.3207	0.452759	0.949748	11.4747	1.23032	0.954749	2.75946	24.3057	16.6445	5.29228	6.31469
5R8W MI-2b	1	52.3166	0.866338	18.5705	7.91764	0.162745	3.1819	14.6581	2.18524	0.076087	0.083616	995.77	981.52	100.216		0.262455	5.54378	0.447011	0.960018	11.0367	1.16867	0.973622	2.58164	33.291	18.4156	5.79999	6.47021
5R8W MI-3a	2	51.5314	0.842124	17.6818	8.55821	0.169021	3.44098	15.3049	1.81315	0.083157	0.061868	967.685	1019.99	99.6852		0.264327	5.68571	0.459212	0.921274	10.7172	1.12316	0.951422	2.87471	39.7867	24.8606	5.92849	6.29997
5R8W MI-3b	1	52.3726	0.868878	18.0759	7.9233	0.162788	2.97063	15.5712	1.84012	0.089505	0.103109	1023.7	1077.79	100.188		0.261912	5.54064	0.452883	0.959808	11.0559	1.21283	0.943391	2.84411	28.6929	15.4784	5.68306	6.05576
5R8W MI-5	1	51.3725	0.921803	17.7102	8.56107	0.177963	3.24635	15.6863	1.76061	0.034696	0.116307	818.53	1063	99.776		0.26473	5.29153	0.458781	0.921288	10.2628	1.15909	0.93937	2.92538	69.8981	14.0439	6.72247	6.11624
5R8W MI-6	3	50.835	0.804445	16.7001	9.46151	0.167329	5.31483	14.569	1.7216	0.082335	0.0688903	925.04	1024.53	99.92		0.266779	5.8976	0.47599	0.873971	10.9601	0.895743	0.975907	2.97005	31.2263	24.2757	6.13755	6.29774
5R8W MI-7	1	51.6951	0.793489	18.1075	8.4809	0.136181	3.19433	15.272	1.96669	0.083497	0.077432	965.71	1059.67	100.01		0.263925	5.95638	0.453242	0.925505	12.9126	1.16813	0.952476	2.74514	30.5957	19.6429	5.93339	6.12803
5R8W MI-10	1	52.0651	0.873678	18.2514	7.97166	0.148228	2.75279	15.2816	1.95634	0.089556	0.068527	1020.15	985.25	99.6594		0.26276	5.5139	0.450492	0.956544	11.9838	1.26421	0.952489	2.749	28.6794	21.8018	5.69707	6.45113
5R8W MI-11a	1	51.8587	0.957755	18.0014	8.15834	0.148766	3.07738	15.369	1.91519	0.107715	0.076512	1006.25	1083.39	99.8797		0.263309	5.12873	0.454197	0.944717	11.9518	1.19088	0.949353	2.78367	24.2848	19.8372	5.75426	6.03228
5R8W MI-11b	1	51.9324	0.845524	18.0761	8.08807	0.179711	2.97752	15.2928	1.92343	0.09465	0.090302	994.95	1074.88	99.7074		0.263138	5.66026	0.45309	0.949174	10.1583	1.21204	0.952044	2.77625	27.2831	17.2638	5.80336	6.067
5R8W MI-12a	1	51.5752	0.8433	17.7028	8.78135	0.162112	3.53239	15.4464	1.85252	0.088065	0.053534	974.28	1046.06	100.24		0.264251	5.67526	0.459191	0.908633	11.1091	1.10787	0.946659	2.84244	29.1633	27.0456	5.89571	6.18424
5R8W MI-12b	1	51.5017	0.84648	17.3607	9.08932	0.141878	3.96944	15.0656	1.82945	0.069379	0.082737	913.29	985.01	100.147		0.264572	5.65607	0.46456	0.892229	12.4702	1.04176	0.958966	2.86412	36.3395	18.5822	6.18864	6.45516
5R8W MI-12c	1	50.6961	0.868999	17.2981	9.10615	0.155907	4.05168	15.0137	1.72148	0.079641	0.048909	943.57	1024.05	99.2374		0.266775	5.53965	0.46558	0.891228	11.4929	1.03051	0.960459	2.9645	32.0005	29.3116	6.03911	6.27866
5R8W MI-12e	1	51.737	0.908001	18.3358	7.85722	0.155201	2.82561	15.6057	1.84312	0.09048	0.033741	937.87	1021.69	99.5879		0.263585	5.34955	0.449337	0.963769	11.5187	1.24577	0.941916	2.84098	28.397	40.9986	6.06071	6.28474
5R8W MI-12f	1	51.8213	0.922344	18.2808	7.96762	0.166052	2.80849	15.7121	1.85953	0.0902	0.074589	979.22	1018.63	99.9028		0.263332	5.28454	0.450114	0.956627	10.8707	1.25044	0.938499	2.82871	28.482	20.2658	5.8697	6.29789
5R8W MI-13c	1	51.3446	0.844058	17.3016	9.25317	0.17204	4.13708	15.1657	1.75596	0.087646	0.065307	817.49	1050.4	100.314		0.265033	5.67034	0.465675	0.883795	10.5612	1.0195	0.955505	2.93271	29.3214	22.7372	6.72985	6.16803
5R8W MI-13d	1	51.3535	0.900962	17.7348	8.61372	0.170491	3.2615	15.3623	1.73888	0.09741	0.068973	1005.74	1102.77	99.5134		0.264678	5.38366	0.458197	0.917782	10.6372	1.1554	0.949202	2.94374	26.6072	21.6784	5.75777	5.95851
5R8W MI-14	3	51.4045	0.893924	17.699	8.63118	0.169852	3.47722	15.4237	1.77543	0.0843063	0.0628831	934.971	1051.45	99.8207		0.264645	5.42067	0.459143	0.918238	10.6883	1.12656	0.947379	2.91062	30.9206	25.0174	6.09652	6.16476
n is number of analyses that were averaged from a single melt inclusion
concentrations given in wt.% unless otherise noted

## Sheet: S3 -Glasses (This Study)
Compositions of pillow basalt glasses
		Compositions														standard deviations 1σ
Sample	n	SiO2	TiO2	Al2O3	FeO	MnO	MgO	CaO	Na2O	K2O	P2O5	Cl (ppm)	S (ppm)	TOTAL		SiO2	TiO2	Al2O3	FeO	MnO	MgO	CaO	Na2O	K2O	P2O5	Cl	S
1187 10r4w	15	49.6221	0.715585	15.2897	9.71324	0.17188	9.18106	12.5249	1.69256	0.0795919	0.0532664	811	890	99.214		0.168715	0.0355347	0.123332	0.0749927	0.0140859	0.0519993	0.0932883	0.0389313	0.0222693	0.0145319	47	54
1187 4R2W	21	49.6911	0.733754	15.1916	9.83883	0.166307	9.30437	12.6217	1.67287	0.0722144	0.0566945	800	888	99.5182		0.210797	0.0342289	0.0969228	0.0838677	0.0107696	0.0554983	0.117974	0.0476081	0.0195816	0.011222	47	51
1187 5r8w	16	49.5988	0.766654	15.3128	9.83384	0.16635	9.257	12.6779	1.68346	0.0801489	0.0588873	810	882	99.6051		0.230002	0.0469291	0.0762108	0.0842524	0.0124818	0.0707752	0.133553	0.0415882	0.0174225	0.0143761	43	58
n is number of analyses that were averaged from a single pillow basalt glass sample
concentrations given in wt.% unless otherise noted

## Sheet: S4 - Olivine
Compositions of Olivine Measured by EPMA
		Compositions (wt.%)												standard deviations 1σ
Sample	n	SiO2	TiO2	Al2O3	FeO	MnO	MgO	CaO	Cr2O3	NiO	P2O5	Total		SiO2	TiO2	Al2O3	FeO	MnO	MgO	CaO	Cr2O3	NiO	P2O5
5R8W MI-01	7	39.7208	0.006674	0.0502514	12.8462	0.202461	46.55	0.343028	0.0582427	0.238833	0.0126924	100.029		0.143585	0.00526397	0.00334899	0.158912	0.00926145	0.116209	0.013982	0.0144632	0.012673	0.0113793
5R8W MI-02	9	40.0477	0.00612856	0.0513267	12.601	0.193922	46.8707	0.312212	0.0539323	0.254104	0.0175159	100.409		0.0953145	0.00432501	0.00588679	0.159771	0.00642005	0.16096	0.0250053	0.00823931	0.0139744	0.0137421
5R8W MI-03	10	39.9775	0.0053946	0.0464312	12.7207	0.194172	46.9015	0.329284	0.0598802	0.260768	0.0213927	100.517		0.121775	0.0040899	0.00681184	0.206855	0.0091613	0.12353	0.0177499	0.0133688	0.0124285	0.0128332
5R8W MI-05	8	40.0468	0.00441587	0.0548963	12.7438	0.194978	46.7707	0.329479	0.0586053	0.249443	0.0234802	100.477		0.190909	0.00244286	0.0140848	0.128644	0.012244	0.122931	0.0129083	0.0097168	0.0110945	0.0217383
5R8W MI-06	5	39.8337	0.0110292	0.0558554	12.5877	0.196946	46.6653	0.338865	0.06024	0.253311	0.022164	100.025		0.279234	0.00215459	0.0100957	0.09993	0.00809194	0.214564	0.00668676	0.0125136	0.0109426	0.0206611
5R8W MI-07	7	40.0484	0.009577	0.046324	12.7197	0.201158	46.6627	0.326849	0.0645941	0.261995	0.00862886	100.35		0.0942053	0.00628406	0.00791081	0.127602	0.00757494	0.168885	0.0302886	0.0179263	0.0141711	0.0113665
5R8W MI-10	7	39.7205	0.00839829	0.0685411	12.7343	0.199917	46.3742	0.343291	0.0561114	0.247248	0.0218597	99.7742		0.124084	0.00299458	0.0529582	0.164736	0.0127094	0.139808	0.0312271	0.00595519	0.017045	0.0303987
5R8W MI-11	7	39.852	0.00412743	0.0489321	12.7049	0.195687	46.6064	0.333412	0.0501264	0.252086	0.0178954	100.066		0.120375	0.00300623	0.0107457	0.214587	0.0118308	0.122459	0.010995	0.00768305	0.0127968	0.0234214
5R8W MI-12a	7	39.609	0.00707171	0.047685	12.7134	0.203891	46.4755	0.328533	0.0492884	0.240319	0.00783557	99.6825		0.196465	0.00230051	0.00992423	0.132008	0.00792793	0.167437	0.0146043	0.00643218	0.0100046	0.00881493
5R8W MI-12b	10	39.5099	0.00290178	0.0510954	12.6455	0.201601	46.3045	0.317907	0.0520464	0.261318	0.0144339	99.3612		0.174389	0.00358183	0.00571647	0.112189	0.00654069	0.189677	0.0122882	0.00852148	0.00905041	0.016397
5R8W MI-12e	6	39.6777	0.0112353	0.049348	12.6544	0.198086	46.3356	0.363975	0.0621118	0.240443	0.0092275	99.6022		0.132052	0.00380347	0.00605478	0.165181	0.0109885	0.10974	0.0258932	0.013399	0.0146967	0.00587082
5R8W MI-13	13	39.8472	0.00926415	0.052782	12.8245	0.197332	46.5648	0.338473	0.0625295	0.253183	0.00666262	100.157		0.182401	0.00311557	0.0121793	0.193116	0.011044	0.194813	0.0167772	0.0130147	0.00899935	0.00767034
5R8W MI-14	7	40.0647	0.00582114	0.0395504	12.8539	0.196855	46.7817	0.33604	0.0534606	0.248857	0.00756686	100.588		0.10256	0.00354008	0.00323927	0.156537	0.0101572	0.121596	0.0265197	0.0102206	0.0121239	0.00830101
10R4W MI-01	7	39.4227	0.00782786	0.0437736	12.7037	0.190462	46.6055	0.347662	0.0576993	0.248826	0.00622529	99.6344		0.140885	0.00358005	0.00374996	0.192538	0.0104119	0.16378	0.0341095	0.0122136	0.0142659	0.0100244
10R4W MI-02	7	39.667	0.00888229	0.0470284	12.4545	0.192924	46.8619	0.315701	0.0500459	0.255468	0.0312766	99.8848		0.116788	0.00296316	0.00650404	0.17452	0.0118273	0.14178	0.00481204	0.00737356	0.00622423	0.0172432
10R4W MI-03	7	39.2334	0.00725829	0.0295947	12.7176	0.194631	46.2132	0.312845	0.0481334	0.246803	0.00190486	99.0053		0.259421	0.00440144	0.00802754	0.136304	0.00672996	0.234312	0.00307591	0.00946962	0.0139365	0.00349512
10R4W MI-04	7	39.1409	0.00439271	0.0415933	12.504	0.188695	45.9471	0.329809	0.0511439	0.23964	0.0330521	98.4802		0.287197	0.00448812	0.0124108	0.184386	0.00987039	0.278142	0.0133164	0.0103353	0.0089765	0.0276798
10R4W MI-06a	7	39.3295	0.00682657	0.0392069	12.8309	0.201874	46.6782	0.347431	0.050839	0.244417	0.0208056	99.75		0.195642	0.00447287	0.0038992	0.0904905	0.00738751	0.0717964	0.014116	0.00429418	0.0134169	0.0181351
10R4W MI-06b	7	39.2339	0.00801271	0.0515343	12.7021	0.192656	46.5727	0.347881	0.0559206	0.24948	0.013206	99.4274		0.118622	0.00491646	0.00749801	0.131825	0.0108042	0.0652379	0.0143338	0.0103971	0.00731253	0.0168341
10R4W MI-07	7	38.9772	0.00916	0.0404721	12.7987	0.197671	46.382	0.342387	0.0504189	0.236673	0.0196521	99.0544		0.163272	0.00283373	0.0107573	0.120635	0.0115158	0.0620576	0.014814	0.0077472	0.00887496	0.0175943
10R4W MI-09	7	39.495	0.00957371	0.0460897	12.7945	0.198118	46.6313	0.316309	0.0470096	0.242354	0.0214333	99.8017		0.14637	0.00606266	0.0179402	0.163408	0.00945964	0.129702	0.0113711	0.0146004	0.0121466	0.0234347
10R4W MI-10	7	39.3351	0.00982343	0.0452724	12.77	0.19209	46.491	0.319092	0.0598843	0.249088	0.0412643	99.5127		0.320004	0.0022006	0.00951245	0.26121	0.0071842	0.192097	0.0110792	0.00914097	0.00991001	0.0222645
10R4W MI-11	7	39.3238	0.005547	0.0438156	12.8507	0.201118	46.7144	0.320066	0.0536393	0.26028	0.01751	99.7908		0.200151	0.00209966	0.0123593	0.189351	0.0116703	0.14329	0.00704806	0.0135028	0.00982781	0.0206177
10R4W MI-12	7	39.0208	0.00902257	0.0410071	12.5808	0.19609	46.5504	0.325663	0.0526767	0.243147	0.00846114	99.0281		0.204954	0.00613193	0.00851956	0.144146	0.0112159	0.130288	0.0224536	0.00792393	0.0171424	0.00734962
10R4W MI-13	7	38.8359	0.00732029	0.034889	12.8693	0.20051	46.3416	0.327254	0.0436713	0.244466	0.005202	98.9101		0.0915346	0.00423422	0.00729527	0.19231	0.0109353	0.144471	0.0169169	0.00608185	0.00943706	0.00678521
10R4W MI-15ab	8	39.3286	0.0103269	0.0574277	12.8004	0.195748	46.4213	0.335065	0.0600899	0.240232	0.0311806	99.4803		0.19258	0.00551258	0.0244124	0.148269	0.0126991	0.0930277	0.0121633	0.0132926	0.0103992	0.0254999
10R4W MI-16	7	39.3928	0.00370557	0.0356974	12.6448	0.194841	46.6679	0.321753	0.0469403	0.253202	0.009768	99.5714		0.13569	0.00187219	0.00430781	0.106966	0.00567037	0.103917	0.0103537	0.00909579	0.0120198	0.0117965
10R4W MI-17	7	39.306	0.00500429	0.0371724	12.7396	0.190388	46.62	0.320947	0.0465209	0.25335	0.00463571	99.5237		0.176054	0.00359746	0.01087	0.142523	0.00763829	0.108512	0.0120987	0.00621944	0.0175486	0.00893479
4R2W MI-01	7	39.4468	0.00609814	0.0595057	12.6832	0.198696	46.7566	0.315687	0.0519661	0.243164	0.040709	99.8025		0.136146	0.00563287	0.0117739	0.173244	0.00786456	0.179478	0.0148734	0.0101755	0.0136371	0.0257377
4R2W MI-02	7	39.8048	0.007017	0.0463864	12.783	0.197183	47.0569	0.341849	0.0537254	0.25056	0.010787	100.552		0.0806468	0.00428177	0.0105423	0.195644	0.0081823	0.123037	0.00369388	0.0128824	0.0127636	0.00565298
4R2W MI-03	7	39.8936	0.00409686	0.0496617	12.7181	0.197423	46.9436	0.326036	0.0566027	0.252894	0.0230831	100.465		0.132113	0.00368102	0.0190326	0.172628	0.0151969	0.0787579	0.0129423	0.00943908	0.0130018	0.0168853
4R2W MI-04	7	39.8726	0.005171	0.0537213	12.6747	0.204	46.9852	0.331528	0.0516727	0.251141	0.0256754	100.455		0.101779	0.00465069	0.0105845	0.177619	0.0124028	0.0464442	0.0177723	0.00538323	0.00503283	0.0203651
4R2W MI-05	10	39.7727	0.0077121	0.051331	12.7846	0.196741	46.8451	0.317127	0.0626514	0.25304	0.0265196	100.317		0.133255	0.00590699	0.00381333	0.181511	0.0123507	0.0997373	0.0125241	0.0111339	0.0086085	0.0172023
4R2W MI-06	7	39.7024	0.00721343	0.047966	12.664	0.206353	46.7643	0.32568	0.0576371	0.244033	0.0232286	100.043		0.0382476	0.00489557	0.004181	0.140209	0.00929218	0.0895175	0.0180277	0.00884309	0.015035	0.0201033
4R2W MI-09	7	40.0042	0.00516029	0.0448289	12.6472	0.200998	46.9136	0.32376	0.0515194	0.253987	0.0157423	100.461		0.107398	0.00519561	0.00658979	0.0784778	0.00667902	0.116878	0.0153112	0.012069	0.0111376	0.0101442
4R2W MI-10bc	18	39.9081	0.00620117	0.0455302	12.5576	0.193829	46.648	0.321894	0.08476	0.245616	0.0164649	100.028		0.161006	0.00510426	0.00822793	0.272961	0.0100308	0.342612	0.0102549	0.0120685	0.0132286	0.0188685
4R2W MI-10a	7	40.4037	0.00525657	0.0501776	12.6988	0.205942	46.9342	0.323036	0.0641953	0.259943	0.0183216	100.963		0.0953536	0.0020258	0.00567469	0.168028	0.00908787	0.10686	0.0162986	0.0129479	0.00693452	0.0140729
n is number of analyses that were averaged from a single olivine grain
concentrations given in wt.%

## Sheet: S5-VG2 as secondary standard
VG2 measured as secondary standard with comparison to database values and previous reportson Cl and S concenctration
SAMPLE	SiO2	TiO2	Al2O3	FeO	MnO	MgO	CaO	Na2O	K2O	P2O5	Cl	S	TOTAL
glass basaltic VG-2	50.5871	1.81703	13.7561	11.7134	0.188037	6.95754	10.6487	2.65012	0.192155	0.194335	0.022922	0.135075	98.8611
glass basaltic VG-2	50.1501	1.85731	13.7438	11.7104	0.187366	7.00646	10.77	2.67554	0.209651	0.200706	0.025691	0.145517	98.6811
glass basaltic VG-2	50.2569	1.83139	13.6887	11.9266	0.22568	7.00659	10.8073	2.51684	0.22532	0.214201	0.033032	0.143492	98.8747
glass basaltic VG-2	50.7381	1.76273	13.7946	12.006	0.187667	6.96514	10.832	2.63686	0.196959	0.188667	0.027602	0.139104	99.4741
glass basaltic VG-2	50.6306	1.87841	13.8381	11.8859	0.201775	6.91441	10.6387	2.66064	0.166972	0.159201	0.027126	0.147425	99.1479
glass basaltic VG-2	50.5152	1.76135	13.809	11.9709	0.211474	6.98574	10.7233	2.65746	0.210171	0.21705	0.021079	0.138951	99.2203
glass basaltic VG-2	49.9589	1.74966	13.7334	11.7926	0.196365	6.94869	10.6078	2.68068	0.188909	0.19843	0.027632	0.140884	98.2226
glass basaltic VG-2	50.1109	1.71164	13.6992	11.8371	0.193988	6.9716	10.7616	2.68102	0.197983	0.190429	0.025663	0.144148	98.5239
glass basaltic VG-2	50.2023	1.81526	13.7937	11.863	0.2	7.00862	11.0105	2.69564	0.146114	0.208503	0.02633	0.137434	99.106
glass basaltic VG-2	50.4455	1.77635	13.8346	11.6626	0.203925	6.92577	10.8328	2.62443	0.172352	0.177562	0.023214	0.134802	98.8126
glass basaltic VG-2	50.2453	1.7997	13.7424	11.8987	0.202614	6.83753	11.0065	2.62562	0.172918	0.180259	0.034505	0.140777	98.8855
glass basaltic VG-2	50.0043	1.88508	13.7543	11.9819	0.218911	6.89203	10.9832	2.6518	0.190036	0.209867	0.024251	0.13339	98.9278
Average	50.3204	1.80383	13.7657	11.8541	0.201483	6.95168	10.8019	2.64639	0.189128	0.194934	0.0265872	0.140083	98.8948
standard devation 1σ	0.24538	0.0514681	0.0466567	0.109001	0.0117328	0.0497395	0.134392	0.044541	0.0208345	0.0162453	0.00375247	0.00427906	0.315537
Database Value (S and Cl values from Rose-Koga et al. (2020), AmMin, 105, 616-626)	50.81	1.85	14.06	11.84	0.22	6.71	11.12	2.62	0.19	0.2	0.0306	0.1343
all concentrations reported in wt. %

## Sheet: S6 - Sulfur_X Model Parameters
Parameters and compositions used as input for Sulfur_X Model (Ding et al. (2023)
Low MgO						High MgO
Parameters			Composition (wt.%)			Parameters			Composition (wt.%)
temperature (°C)	1170		SiO2	51.01		temperature (°C)	1210		SiO2	49.98
delta_FMQ	-0.2		TiO2	0.99		delta_FMQ	-0.2		TiO2	0.78
H2O_initial (wt.%)	0.48		Al2O3	14.14		H2O_initial (wt.%)	0.28		Al2O3	15.38
CO2_initial (ppm)	230		FeOT	11.49		CO2_initial (ppm)	165		FeOT	9.7905
S_initial (ppm)	1175		MnO	0.27		S_initial (ppm)	990		MnO	0.21
COH_model	0		MgO	7.27		COH_model	0		MgO	8.9
fO2_tracker	0		CaO	12.51		fO2_tracker	0		CaO	12.88
l	100		Na2O	1.88		l	100		Na2O	1.7
m	100		K2O	0.12		m	100		K2O	0.09
S_Fe_choice	0		P2O5	0		S_Fe_choice	0		P2O5	0
sigma	-					sigma	-
slop_h2o	-					slop_h2o	-
constant_h2o	-					constant_h2o	-
INT	-					INT	-
BAR (MPa)	0					BAR (MPa)	0

## Sheet: S7-previous glass data
Compositions of Pillow Basalt glasses and glasses in volcaniclastics from previous studies of Ontong Java
	Sample	SiO2	TiO2	Al2O3	FeOT	Mno	Mgo	CaO	Na2O	K2O	P205	S (ppm)	Cl (ppm)	H2O	CO2 (ppm)	saturation P from VESIcal (bars)
Roberge et al. 2004	1183A-55R-1 32	50.58	1.12	14.19	11.25	0.19	7.18	12.19	2.13	0.11	0.09	948	673	0.24	45	118.719
	1183A-55R-2 134	50.46	1.14	14.23	11.33	0.21	7.21	12.18	2.12	0.11	0.08	1029	664	0.23	44	118.292
	1183A-56R-1 10	51.06	1.16	14.22	11.35	0.21	7.16	12.17	2.05	0.12	0.07	1156	601	0.2	43	119.262
	1183A-57R-2 97	50.54	1.19	14.14	11.26	0.21	7.21	12.16	2.1	0.1	0.09	1013	638	0.24	46	125.492
	1183A-58R-1 97	50.89	1.14	14.05	11.29	0.18	7.19	12.11	2.11	0.11	0.11	1131	667	0.23	47	128.855
	1183A-60R-1 36	51	1.11	14.11	11.25	0.22	7.23	12.19	2.13	0.11	0.09	957	666	0.22	46	124.853
	1183A-62R-2 1	50.86	1.14	14.18	11.12	0.21	7.34	12.3	2.03	0.11	0.08	1083	713	0.22	57	154.986
	1183A-64R-1 112	50.9	1.14	14.12	11.25	0.19	7.22	12.16	2.12	0.11	0.1	1139	691	0.23	51	138.31
	1183A-65R-2 19	51.15	1.16	14.1	11.13	0.22	7.23	12.1	2.13	0.11	0.1	982	678	0.23	43	119.408
	1183A-67R-3 60	50.97	1.11	14.13	11.27	0.22	7.24	12.16	2.2	0.11	0.08	1021	737	0.23	41	110.578
	1184A-13R-3 142	49.86	0.88	14.82	9.5	0.17	8.97	13.16	1.79	0.08	n.a.	641	495	0.17	19	51.5541
	1184A-31R-7 53	50.63	1.3	13.27	12.32	0.23	6.7	11.15	2.47	0.14	n. a.	692	3171	0.14	47	118.393
	1184A-39R-7 95	49.82	1.03	13.92	10.24	0.18	7.81	12.53	2.04	0.1	n.a.	725	1708	0.16	31	80.9299
	1184A-41R-6 67	50.81	1.03	14.2	10.59	0.18	7.98	12.61	2.09	0.11	n.a.	717	1678	0.16	27	71.1368
	1184A-42R-5 69	50.21	1.04	14.01	10.44	0.2	7.91	12.37	2.05	0.1	n. a.	720	1685	0.16	24	64.3339
	1184A-44R-3 78	50.8	1.04	14.23	10.59	0.17	7.96	12.49	2.12	0.1	n.a.	708	1690	0.16	30	78.7258
	1 184A-45R-2 75	50.35	1.02	14.03	10.46	0.19	7.95	12.42	2.07	0.1	n.a.	705	1699	0.17	29	76.8108
	1185A-9R-1 130	49.43	0.75	15.33	9.64	0.18	9.13	12.84	1.75	0.07	0.06	895	812	0.18	94	235.38
	1185A-9R-3 88	49.74	0.78	15.34	9.69	0.17	9.28	12.67	1.72	0.07	0.05	922	778	0.19	106	269.335
	1185A-9R-4 100	49.94	0.77	15.38	9.73	0.17	9.24	12.73	1.74	0.07	0.06	876	777	0.19	100	254.628
	1185A-10R-1 10	50.41	0.73	15.43	9.64	0.18	9.22	12.33	1.7	0.08	0.07	902	756	0.18	92	244.582
	1185A-10R-1 40	48.87	0.72	15.2	9.91	0.17	9.06	12.32	1.69	0.08	0.07	814	798	0.18	98	247.753
	1185A-10R-2 1	50.33	0.74	15.46	9.67	0.2	9.18	12.32	1.69	0.07	0.06	867	759	0.2	102	271.058
	1185B-3R-1 54	49.13	0.78	15.45	9.87	0.18	9.19	12.9	1.72	0.07	0.06	964	885	0.19	101	248.85
	1185B-5R-7 19	49.59	0.73	15.47	9.82	0.16	9.3	12.8	1.71	0.07	0.08	818	936	0.19	104	260.668
	1185B-6R-1 95	49.83	0.76	15.46	9.92	0.19	9.2	12.93	1.71	0.07	0.07	865	919	0.18	97	244.871
	1185B-9R-1 55	49.19	0.76	15.47	9.87	0.16	8.81	13.06	1.72	0.08	0.07	957	929	0.21	104	259.242
	1185B-9R-3 pc3	49.78	0.78	15.88	9.64	0.2	8.41	13.03	1.78	0.08	0.07	929	980	0.19	95	244.962
	1185B-15R-1 149	49.86	0.75	15.66	9.71	0.18	8.73	13.07	1.76	0.08	0.06	832	836	0.2	105	266.878
	1185B-16R-164	49.47	0.74	15.86	9.56	0.2	8.34	13.35	1.81	0.07	0.07	875	987	0.18	105	261.993
	1185B-23R-1 4	50.58	1.07	14.21	11.48	0.17	7.31	12.52	2.05	0.11	0.1	1050	915	0.24	104	265.077
	1185B-23R-1 78	50.71	1.1	14.2	11.35	0.19	7.35	12.44	2.1	0.11	0.09	1072	779	0.21	100	253.975
	1186A-31R-2 47	50.87	1.07	14.18	11.15	0.21	7.31	12.46	2.09	0.1	0.08	1034	735	0.19	87	225.14
	1186A-31R-3 34	51.01	1.06	14.24	11.34	0.22	7.35	12.5	2.11	0.1	0.11	1097	717	0.18	92	234.967
	1186A-31R-3 47	51.06	1.09	14.28	11.38	0.18	7.39	12.57	2.1	0.1	0.07	972	717	0.23	107	272.885
	1186A-32R-3 68	50.23	1.1	14.05	11.39	0.2	7.37	12.44	2.08	0.11	0.09	1041	740	0.23	101	253.167
	1186A-32R-3 76	50.62	1.02	14.12	11.33	0.25	7.34	12.36	2.08	0.09	0.1	953	743	0.22	99	253.551
	1186A-33R-1 27	52.07	1.07	14.54	11.29	0.21	7.32	11.99	2.11	0.1	0.1	962	687	0.22	97	264.485
	1186A-34R-4 98	51.39	1.03	14.35	11.44	0.19	7.33	11.88	2.01	0.11	0.11	1031	693	0.23	102	278.144
	1186A-34R-5 57	50.92	1.05	14.26	11.43	0.2	7.42	12.51	2.09	0.11	0.1	1023	907	0.19	89	226.619
	1187A-3R-2 104	49.7	0.73	15.42	9.54	0.17	8.91	12.98	1.7	0.07	0.06	881	946	0.17	118	301.525
	1187A-4R-2 70	49.67	0.68	15.45	9.57	0.17	9.01	12.87	1.7	0.07	0.08	967	954	0.19	109	278.691
	1187A-5R-7 62	49.65	0.71	15.54	9.54	0.17	8.97	12.96	1.69	0.07	0.05	962	955	0.21	117	299.285
	1187A-6R-7 102	49.94	0.78	15.55	9.66	0.16	8.92	12.97	1.79	0.07	0.05	964	963	0.21	110	277.855
	1187A-7R-2 53	49.63	0.74	15.42	9.56	0.16	8.71	12.96	1.71	0.07	0.09	769	998	0.18	87	226.142
	1187A-7R-5 106	50.12	0.71	15.45	9.47	0.15	8.76	12.9	1.69	0.07	0.04	881	960	0.2	112	295.933
	1187A-8R-2 133	50.04	0.69	15.45	9.52	0.14	8.84	12.91	1.7	0.08	0.06	799	974	0.21	116	302.221
	1187A-9R-6 103	50.2	0.75	15.47	9.5	0.18	9.01	12.92	1.69	0.08	0.07	930	960	0.2	109	285.151
	1187A-10R-4 63	49.82	0.74	15.62	9.73	0.18	8.88	12.99	1.72	0.07	0.05	972	980	0.2	109	278.398
	1187A-11R-2 1	50.05	0.74	15.61	9.69	0.17	8.82	12.98	1.7	0.07	0.05	961	1016	0.2	115	297.801
	1187A-12R-1 145	49.98	0.73	15.61	9.71	0.17	8.81	12.95	1.73	0.08	0.04	945	1005	0.21	115	295.814
	1187A-13R-6 39	50.16	0.73	15.61	9.68	0.18	8.92	12.84	1.74	0.07	0.07	951	993	0.19	109	281.562
	1187A-14R-4 35	49.75	0.71	15.54	9.63	0.15	8.87	13.03	1.71	0.07	0.06	969	1021	0.2	111	283.682
	1187A-15R-1 83	50.11	0.77	15.62	9.54	0.17	8.76	13.19	1.72	0.07	0.07	980	1012	0.22	111	287.223
	1187A-16R-5 96	49.94	0.73	15.62	9.68	0.17	8.8	13	1.72	0.07	0.08	935	999	0.23	111	286.335
Reekie et al. (2019)	IODP48	50.5331	1.60425	14.2565	12.6486	0.222524	7.12001	11.9267	2.26037	0.20055	0.135278	1087.91	435.699	0.47835	58.5387	147.51
	IODP28	50.1826	1.62462	14.3447	12.5348	0.251764	7.11642	11.862	2.2957	0.196702	0.130841	1184.99	494.715	0.483468	59.1885	149.383
	IODP53	49.7783	1.60694	14.1338	12.3385	0.252091	6.97518	11.9276	2.2499	0.199686	0.145061	1146.06	460.073	0.468126	58.3861	146.271
	IODP54	50.0535	1.63395	14.0578	12.2942	0.214319	6.90332	11.8688	2.21068	0.194565	0.13712	1191.24	518.35	0.584639	56.2994	153.421
	IODP19	50.4599	1.1221	14.1853	12.1257	0.237059	7.40082	12.1482	2.08039	0.105158	0.0951324	995.283	663.953	0.287981	163.211	359.917
	IODP56	51.2068	1.11448	13.9274	12.2079	0.22199	7.25519	12.1582	2.02201	0.110331	0.115641	1393.2	866.505	0.819941	17.1046	100.581
	IODP35	50.1468	1.23725	14.2315	11.8645	0.208103	7.79921	12.487	2.07576	0.135615	0.10913	1065.41	304.789	0.327483	192.174	424.111
	IODP67	49.9757	1.2466	14.3034	11.0738	0.209432	8.28762	12.6184	2.06255	0.127127	0.0909227	1076.28	315.868	0.326896	190.187	419.828
	IODP43	50.6633	1.26569	14.8403	11.4557	0.248506	7.64361	12.4988	2.32633	0.187508	0.154923	1010.59	282.528	0.325175	199.8	440.262
	IODP78	50.2034	1.28256	14.4761	11.2628	0.181922	8.41369	12.6011	2.03573	0.127586	0.063965	1043.61	298.52	0.314169	192.905	424.894
	IODP40	50.8407	1.09195	14.2302	11.8711	0.22293	7.5949	12.496	2.01816	0.0988975	0.0968978	924.047	499.991	0.278399	56.757	129.846
	IODP68	50.5687	1.10425	13.9931	11.153	0.216415	8.11374	12.6407	1.99748	0.100818	0.0740483	947.252	520.859	0.276344	56.6109	129.43
	IODP52	51.5609	1.12807	14.0266	11.7452	0.232732	7.46247	12.1866	1.9878	0.100071	0.0983923	981.03	548.243	0.282311	58.3196	133.427
	IODP36	51.4278	1.12127	14.2031	12.0007	0.219945	7.5948	12.329	2.03703	0.109094	0.0899931	940.986	507.568	0.279328	57.9083	132.388
	IODP69	50.749	1.07891	14.1022	11.1153	0.192802	8.21843	12.5013	1.98857	0.102452	0.0726717	953.529	567.693	0.273969	114.855	255.254
	IODP38	49.8302	1.09429	14.1729	11.3182	0.217759	7.66825	12.5183	2.03063	0.105658	0.0991	920.831	531.521	0.269664	118.317
	IODP38	50.7848	1.10766	14.3221	11.8121	0.228823	7.71451	12.551	1.96627	0.100771	0.0833941	920.831	531.521	0.269664	118.317
	IODP39	51.0164	1.07831	14.2918	11.7758	0.239471	7.6459	12.5104	2.0299	0.100091	0.0952869	831.917	592.36	0.242209	135.325	297.887
	IODP71	49.8175	0.753088	15.2998	9.47347	0.174951	10.4453	13.0865	1.6842	0.0677823	0.0444187	836.811	601.221	0.229693	119.137	262.531
	IODP63	49.8063	0.70306	15.2332	9.46849	0.177835	10.5036	13.0448	1.6601	0.071798	0.0640227	792.294	549.29	0.223994	125.867	276.8
	IODP46	50.4204	0.732854	15.4275	10.0886	0.187738	9.68992	12.9011	1.64593	0.073003	0.0598436	834.138	595.82	0.227167	121.881	268.34
	IODP50	50.0064	0.759834	15.4922	10.1689	0.214153	9.67055	12.9095	1.68304	0.0781901	0.0671178	866.64	614.784	0.231324	123.805	272.65
	IODP74	50.0676	0.729934	15.3041	9.57259	0.175163	10.308	12.9307	1.64041	0.0790495	0.036082	840.56	608.217	0.229831	119.831	264.031
	IODP18	49.9856	0.755929	15.3359	10.1425	0.194579	9.61244	12.8116	1.65947	0.0705317	0.0664643	797.158	568.224	0.226152	119.783	263.783
	IODP77	50.3867	0.745109	15.485	9.62997	0.149081	10.1633	13.1999	1.6347	0.0765983	0.0512953	822.107	584.373	0.225323	119.832	263.856
	IODP17	49.5511	0.753212	15.4616	10.1264	0.208458	9.67226	12.7906	1.65825	0.0678221	0.062356	813.875	586.109	0.22514	116.217	256.06
	IODP58	49.2312	0.771965	15.3988	9.75393	0.198344	9.1625	12.9218	1.6195	0.0717303	0.071513	811.492	576.238	0.252313	157.33	345.593
	IODP45	50.1064	0.726558	15.6967	9.82452	0.195484	9.2292	13.1381	1.66808	0.0686652	0.0565253	800.737	567.331	0.239624	135.646	298.469
	IODP47	50.9043	0.759156	15.4859	10.2627	0.181943	9.35755	12.9242	1.66056	0.0753056	0.0684899	816.531	583.587	0.235482	135.955	298.964
	IODP75	50.2742	0.770366	15.5306	9.38439	0.197862	9.8842	13.2519	1.65723	0.0690523	0.0446213	823.131	590.47	0.233176	133.753	294.134
	IODP72	50.1525	0.744148	15.4894	9.29199	0.173702	9.77406	13.3525	1.66248	0.0697493	0.0552797	819.003	583.294	0.23834	134.414	295.768
	IODP64	49.6666	0.723842	15.4213	9.38372	0.18318	10.0346	13.1668	1.65697	0.0693547	0.050012	828.743	593.625	0.239284	135.781	298.746
	IODP25	50.1257	0.742343	15.1606	10.1324	0.192302	9.32546	13.0124	1.61334	0.0713808	0.0516527	844.742	611.814	0.237989	142.735	313.641
	IODP26	49.4812	0.751074	15.2975	10.1669	0.192393	9.37948	13.0752	1.62436	0.0670323	0.0672893	857.306	623.846	0.24172	143.984	316.481
	IODP41	50.0377	0.728825	15.5141	10.2328	0.197802	9.27996	13.0751	1.64735	0.0784446	0.0813868	803.102	562.211	0.248731	140.131	308.501
	IODP76	50.1464	0.744775	15.5044	9.337	0.181613	9.79998	13.352	1.64494	0.0738937	0.0455473	835.084	600.948	0.234749	136.951	301.075
Concentrations given in wt.% unless otherwise noted

## Sheet: S8-previous MI data
Compositions of rehomogenized melt inclusion from Jackson et al. (2015)
Sample	SiO2	TiO2	Al2O3	FeO	MnO	MgO	CaO	Na2O	K2O	P2O5	S (ppm)	Cl (ppm)	H2O	CO2 (ppm)	saturation P from VESIcal (bars)
1	50.4639	0.730752	16.026	8.85553	0.162985	9.32118	12.5777	1.67719	0.0879848	0.0968411	700.346	765.229	0.270015	62	140.102
2A	53.6558	1.00482	15.5721	7.60311	0.17653	7.93677	11.2169	2.45141	0.232547	0.150063	327.074	360.201	0.698997	22	93.3842
3	50.1251	0.649636	15.7834	8.76039	0.21808	9.28022	13.2331	1.76486	0.0446286	0.140572	948.356	1604.69	0.411595	42	105.338
28	50.3102	0.707195	16.4074	8.71072	0.13003	8.58983	13.4367	1.58451	0.0928603	0.0305381	623.615	632.999	0.340556	62	143.853
10A	49.599	0.685064	16.0649	9.31525	0.173073	8.90372	13.385	1.71995	0.0880396	0.0661265	838.742	869.866	0.365818	34	85.632
10B	50.2315	0.699998	16.0789	9.2206	0.206679	8.81811	12.8154	1.71278	0.0743061	0.14168	772.738	842.408	0.370127	122	275.269
17	50.4584	0.494625	17.5528	7.21249	0.151428	8.79771	13.406	1.71604	0.0795196	0.131034	507.481	601.619	0.207544	33	74.5742
20	49.9409	0.840623	16.3256	8.59038	0.191584	8.65418	13.5941	1.7349	0.0765584	0.0511709	698.59	799.964	0.370597	90	206.068
23	49.7665	0.809646	17.0131	8.55341	0.105602	8.51934	13.1165	1.83389	0.2289	0.0530571	501.563	759.026	0.111857	18	40.3897
4	49.844	0.612116	16.7291	8.15576	0.168057	8.63915	14.014	1.78491	0.0362478	0.0166951	733.335	232.597	0.429608	184	412.412
7A	49.8379	0.444375	15.9635	8.67027	0.130578	9.85279	13.3959	1.62712	0.0261688	0.0514912	862.853	307.015	0.376408	55	132.222
9B	50.058	0.492816	16.4343	8.33052	0.223399	8.92971	13.6648	1.75436	bdl	0.0954174	633.641	179.446	0.477745	57	143.582
Concentrations given in wt.% unless otherwise noted
